# Supplementary material for: Subchronic exposure to titanium dioxide nanoparticles modifies cardiac structure and performance in spontaneously hypertensive rats
Source: Springer Nature journal article supplement (doi:10.1186/s12989-019-0311-7), 2019-06-24
Supplement: MOESM1 [file 12989_2019_311_MOESM1_ESM.pdf]

Supraventricular extrasistole

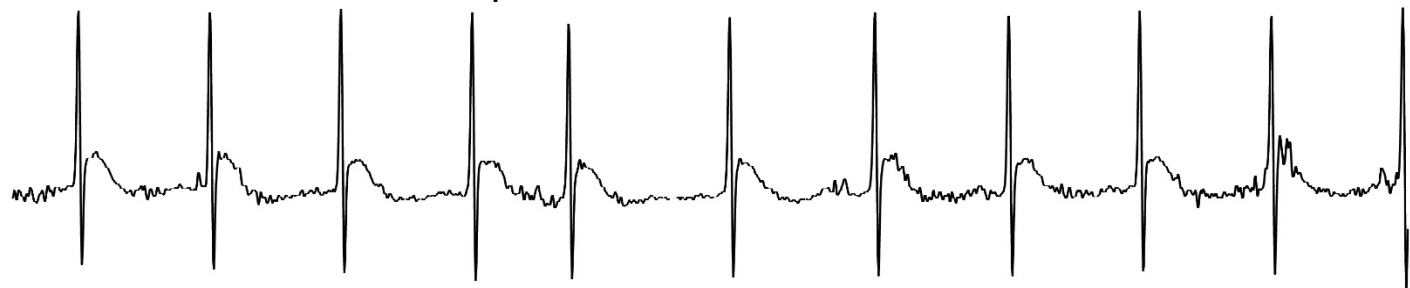

Sinus arrhythmia

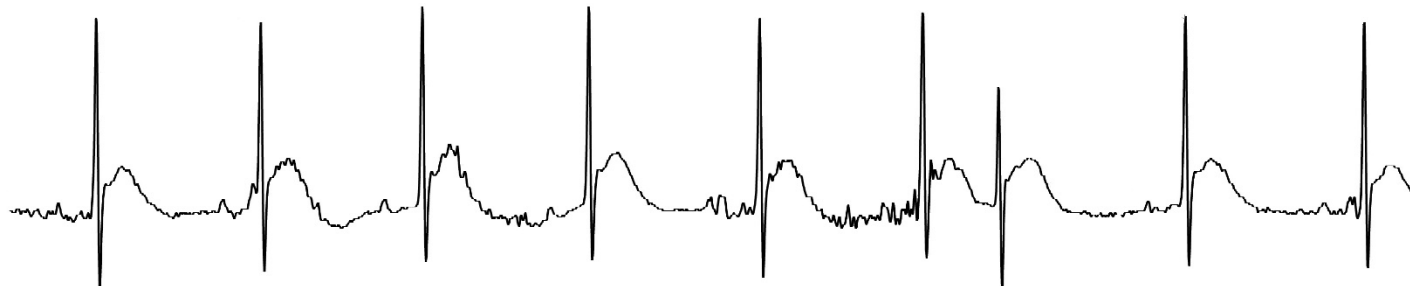

Sinus pause followed by Tachyarrhythmia

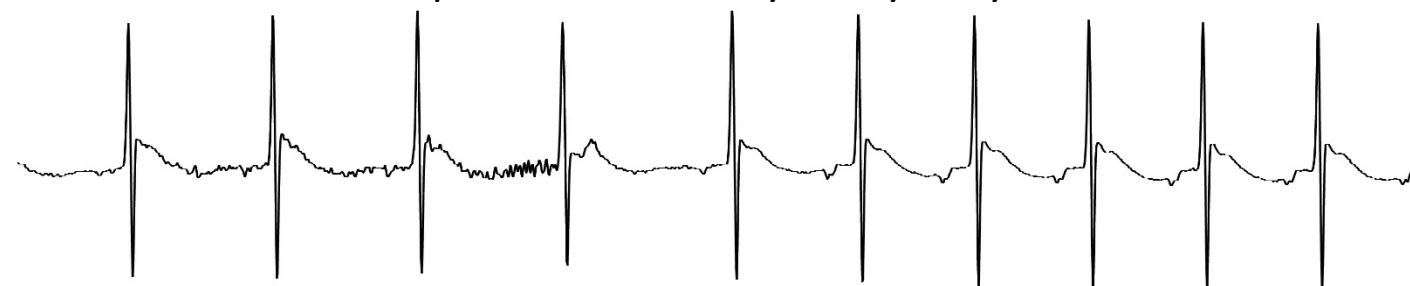

AV-block

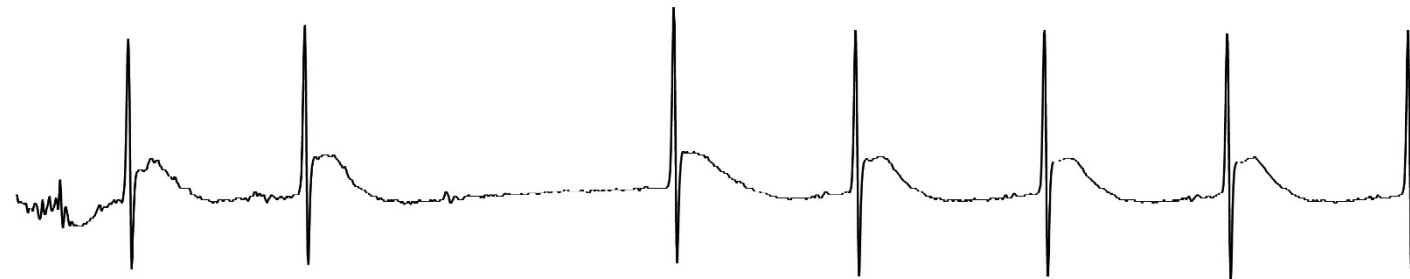

Ventricular extrasistole

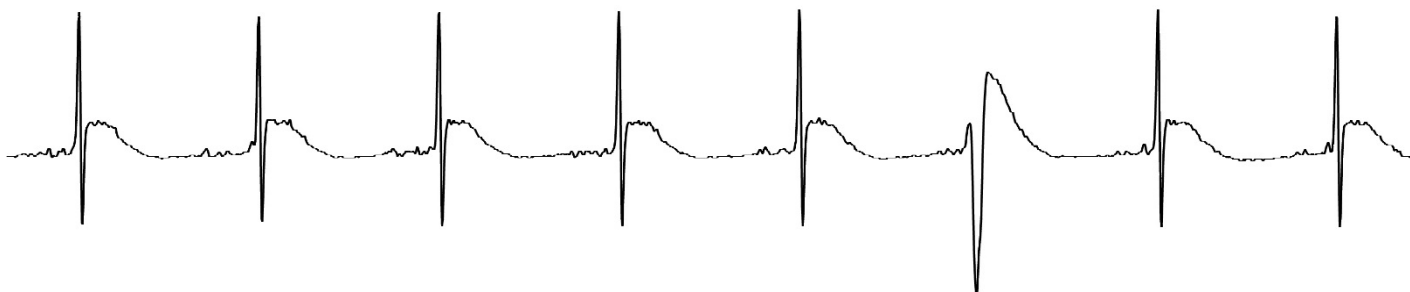

Multiple ventricular extrasistoles

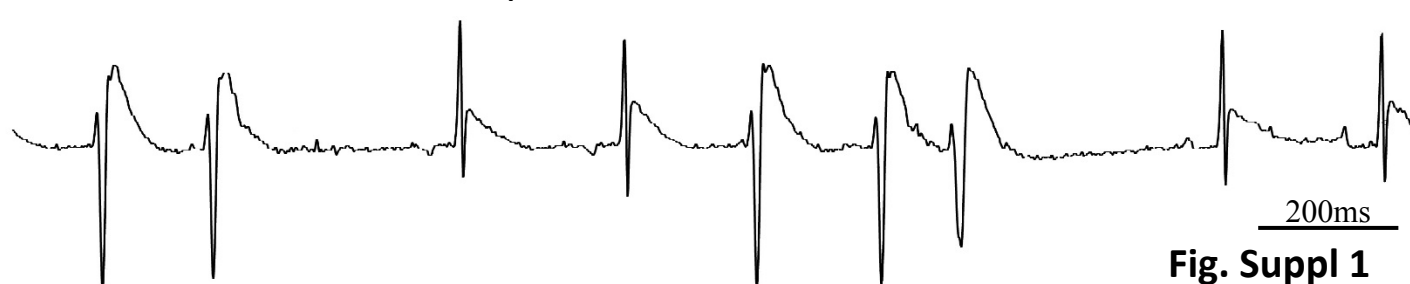

200ms

Fig. Suppl 1
