# Supplementary material for: Subchronic exposure to titanium dioxide nanoparticles modifies cardiac structure and performance in spontaneously hypertensive rats
Source: Springer Nature journal article supplement (doi:10.1186/s12989-019-0311-7), 2019-06-24

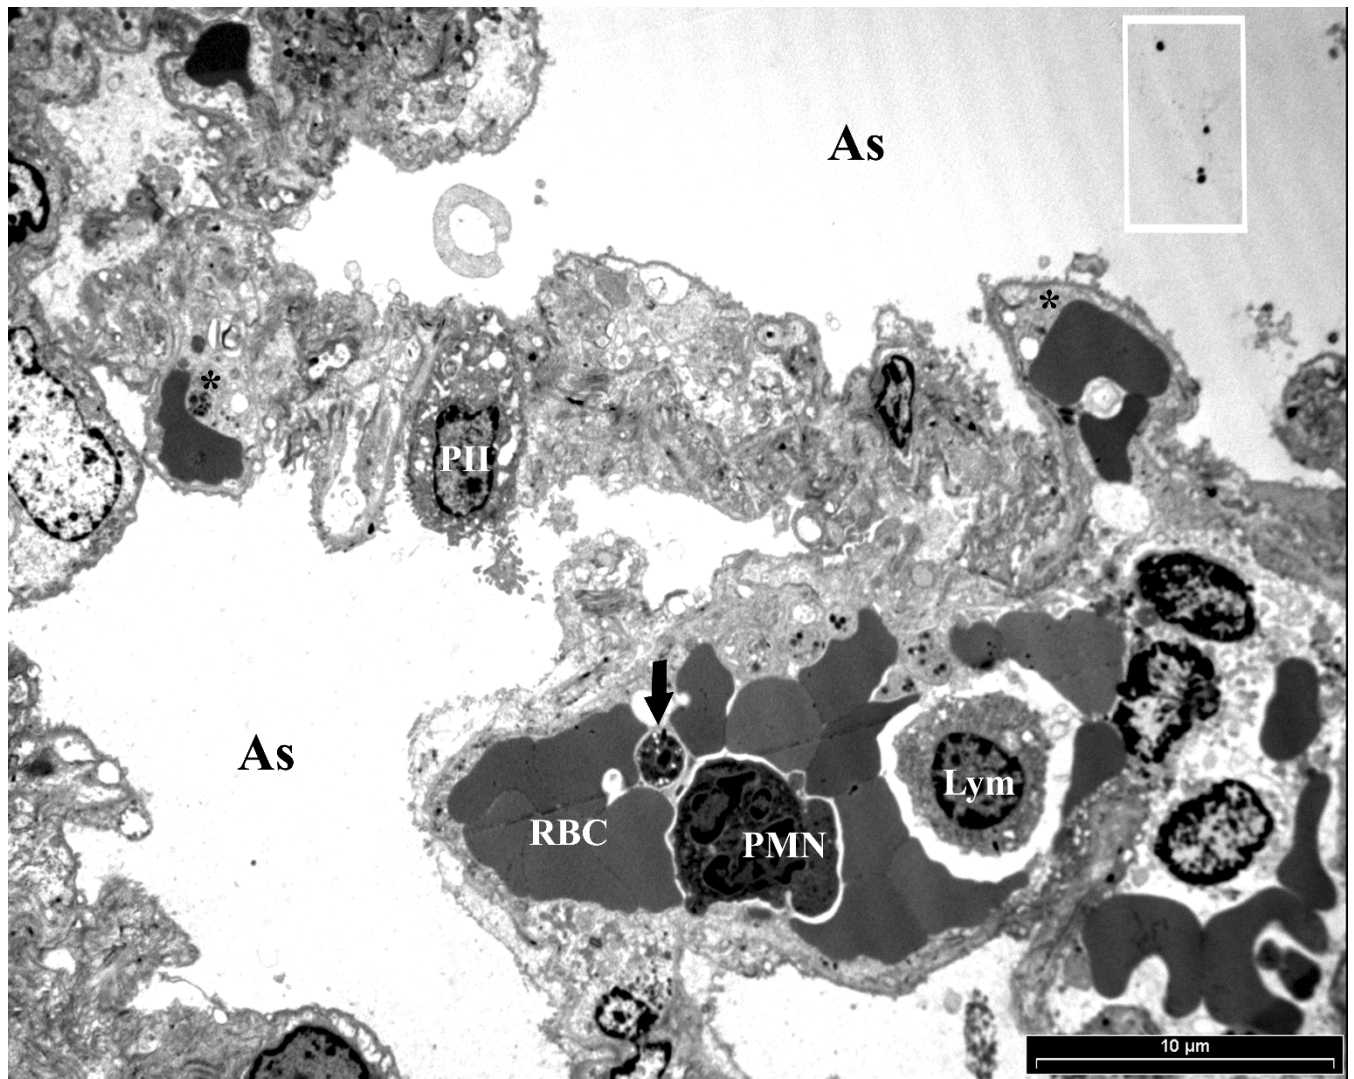

Supplement: MOESM2 [file 12989_2019_311_MOESM2_ESM.pdf]
