# Supplementary material for: Subchronic exposure to titanium dioxide nanoparticles modifies cardiac structure and performance in spontaneously hypertensive rats
Source: Springer Nature journal article supplement (doi:10.1186/s12989-019-0311-7), 2019-06-24
Supplement: MOESM3 [file 12989_2019_311_MOESM3_ESM.pdf]

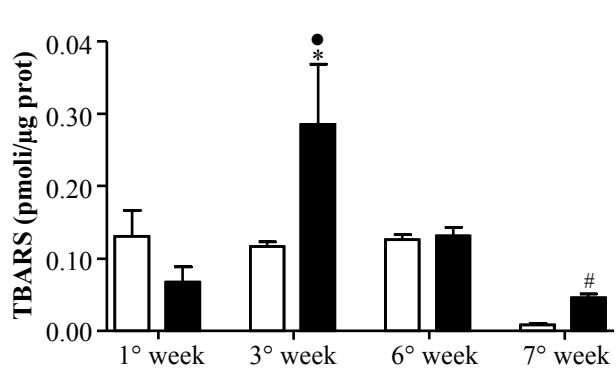

□ CTRL  
■ TiO<sub>2</sub>-NP

● p<0.05 vs. CTRL

\* p<0.05 vs. corresponding 1° week

# p<0.05 vs. corresponding 3° week
