# Supplementary material for: Subchronic exposure to titanium dioxide nanoparticles modifies cardiac structure and performance in spontaneously hypertensive rats
Source: Springer Nature journal article supplement (doi:10.1186/s12989-019-0311-7), 2019-06-24
Supplement: MOESM4 [file 12989_2019_311_MOESM4_ESM.pdf]

**Table S1: List of primer sequences 5'-3' used for real-time PCR analysis.**

| <b>PRIMER</b> | <b>SEQUENCE</b>                   |
|---------------|-----------------------------------|
| GAPDH fw      | 5'-CCC CCA ATG TAT CCG TTG TG-3'  |
| GAPDH rev     | 5'-TAG CCC AGG ATG CCC TTT AGT-3' |
| COL1A1 fw     | 5'-TAAGGGTGAAGCTGGTCCCC-3'        |
| COL1A1 rev    | 5'- TTCACCACTGTTGCCTTTGG-3'       |
| COL1A2 fw     | 5'-CCTCAGGGTGTTCAAGGTGG-3'        |
| COL1A2 rev    | 5'- GACCACGTTCTCCTCTTGG-3'        |
| COL3A1 fw     | 5'- CACAGAGGCTTTGATGGACG-3'       |
| COL3A1 rev    | 5'- AACCTCACCTTAGCACCAG-3'        |
| COL4A1 fw     | 5'- TCCAGGTTTCGCTGTTCCA-3'        |
| COL4A1 rev    | 5'- GCTCTCTCCTTTCTGACCTTTC-3'     |
| TGFβ1 fw      | 5'- ACCAAGGAGACGGAATACAGG- 3'     |
| TGFβ1 rev     | 5'-AGGACCTTGCTGTACTGTGT-3'        |
| CTGF fw       | 5'- CCTAGCTGCCTACCGACTG- 3'       |
| CTGF rev      | 5'- TTTTGCCCTTCTTAATGTTTTCC-3'    |
| ACTA2 fw      | 5'- TGGAAAAGATCTGGCACCAC-3'       |
| ACTA2 rev     | 5'- GAGTCCAGCACAATACCAGT- 3'      |
